# Supplementary material
Source: PubMed Central journal article supplement (PMC2876715)

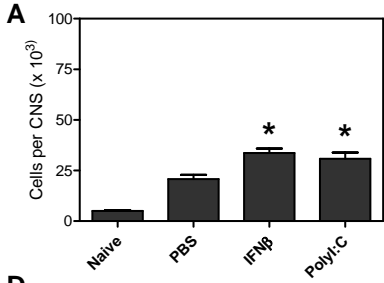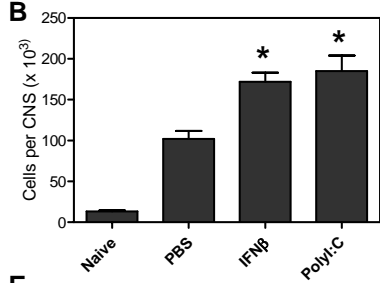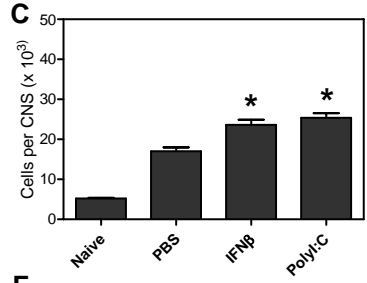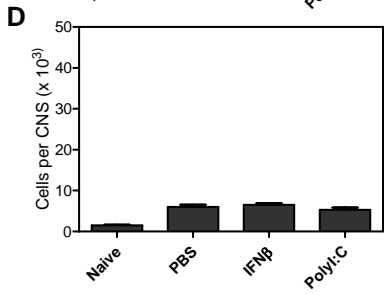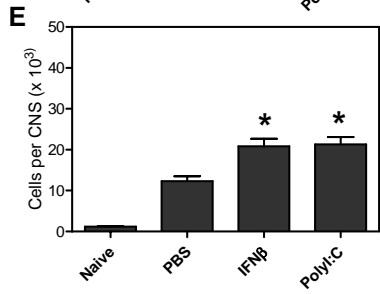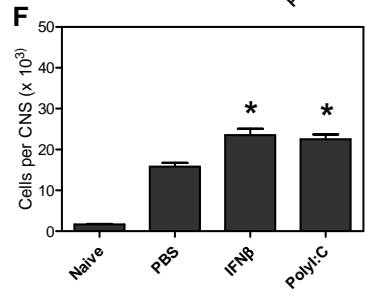

Supplement: NIHMS199297-supplement-Supp_Figure.pdf [file NIHMS199297-supplement-Supp_Figure.pdf]
